# Supplementary material for: Participants’ uptake of clinical trial results: a randomised experiment
Source: PubMed Central journal article supplement — Br J Cancer. 2010 Mar 2;102(7):1081–4. doi: 10.1038/sj.bjc.6605592 (PMC2853089; doi:10.1038/sj.bjc.6605592), 2010-03-02
Supplement: 6605592x1.pdf [file 6605592x1.pdf]

## [ Cancer du sein ] Les premiers résultats de l'essai PACS 04

*Les premiers résultats de l'essai PACS 04, auquel vous participez, ont été récemment présentés lors d'un important congrès aux Etats-Unis. Ces résultats apportent des informations intéressantes pour le traitement du cancer du sein chez les patientes qui surexpriment une protéine particulière appelée HER2. Comme il est légitime que vous soyez informée des nouvelles connaissances apportées par l'essai auquel vous contribuez, en voici une synthèse.*

**Conception-Rédaction:**

Franck FONTENAY, RCP Communication

**Comité Editorial:**

Dr Jocelyne BERILLE  
Dr Jean GENEVE  
Dr Françoise MAY-LEVIN  
Anne-Laure MARTIN  
Jean-Pierre ESCANDE  
Marie LANTA  
Anne MALCA  
Sylvia ACHIN

**Impression:**

IDEM 41

**L**e traitement du cancer du sein repose sur plusieurs approches complémentaires. En premier lieu, une intervention chirurgicale qui vise à retirer la tumeur\*. Une fois l'opération réalisée, d'autres stratégies thérapeutiques sont généralement mises en œuvre. Elles ont pour but de compléter l'intervention du chirurgien et de prévenir les risques de récidives\* (ou rechutes) locales et à distance.

La radiothérapie consiste à détruire les éventuelles cellules cancéreuses qui auraient pu rester dans l'organisme malgré

l'acte chirurgical, en les exposant à des rayons. De son côté, la chimiothérapie repose sur l'administration de médicaments s'attaquant aux éventuelles cellules cancéreuses disséminées à distance.

Enfin, lorsque le cancer est sensible aux hormones produites par l'organisme (on dit alors qu'il est hormonodépendant), il peut être proposé un traitement à visée hormonale (une hormonothérapie), c'est-à-dire la prise d'un médicament agissant en inhibant l'action des hormones qui stimulent la croissance des cellules tumorales: les œstrogènes (contre les

## [ DATES CLÉS ]

- **Fin 2000:**  
lancement de l'essai
- **Février 2001 – août 2004:**  
inclusion des 3010 participantes
- **Février 2005:**  
dernière administration de la chimiothérapie
- **Mars 2006:**  
dernière administration de la thérapie ciblée
- **Décembre 2007:**  
présentation des résultats sur la thérapie ciblée

hormones). Le choix d'un ou de plusieurs de ces traitements est fonction des caractéristiques de la maladie et de chaque patiente.

En associant chirurgie et un ou plusieurs des traitements complémentaires, il est aujourd'hui possible d'obtenir la guérison ou la rémission\* d'un grand nombre de cancers du sein. Toutefois, le taux de succès n'est pas de 100 %. C'est pourquoi la recherche de nouveaux traitements et de nouvelles stratégies thérapeutiques est toujours très active.

Les nombreux essais cliniques mis en œuvre visent notamment à identifier de nouvelles associations de médicaments à la fois plus efficaces et mieux tolérés. PACS 04, auquel vous avez participé, fait partie des essais réalisés par la Fédération Nationale des Centres de Lutte Contre le Cancer qui contribuent à cette recherche.

### *Quels sont les objectifs de l'essai ?*

PACS 04 est un essai destiné à répondre à deux questions :

- **La première est de savoir quelle est la meilleure chimiothérapie à proposer après l'intervention chirurgicale.**

A l'époque où l'essai a été élaboré et lancé, le traitement standard consistait à administrer l'association appelée « FEC 100 », c'est-à-dire l'association de trois médicaments (le 5-Fluoro-uracile, l'Epirubicine et la Cyclophosphamide), pendant six cycles\* de 21 jours chacun. Cette association, qui a fait la preuve de son efficacité a été considérée comme le traitement de référence de l'essai.

Elle a été comparée à une autre chimiothérapie associant un nouveau médicament, le docétaxel, qui fait partie de la famille des taxanes\*, et l'épirubicine, médicament également présent dans l'association FEC 100. Cette chimiothérapie était elle aussi proposée pour une durée de six cycles.

La comparaison de ces deux chimiothérapies a pour but d'identifier laquelle est la plus efficace pour prévenir les récurrences cinq ans après l'intervention chirurgicale.

- **La seconde question de l'essai est de déterminer si la prise d'une « thérapie ciblée », une fois la chimiothérapie terminée, apporte un bénéfice supplémentaire.**

Les thérapies ciblées sont des médicaments qui agissent de manière plus spécifique sur les cellules cancéreuses que ne le font les chimiothérapies classiques. Elles « ciblent » en effet les cellules malades un peu comme des missiles à tête chercheuse : ce type de médicament est conçu pour agir uniquement sur des cellules qui présentent une caractéristique particulière.

Dans le cas du cancer du sein, il a été constaté que chez environ un quart des femmes, les cellules cancéreuses surexpriment une protéine appelée HER2. Celle-ci facilite la croissance de la tumeur. Un médicament a été mis point, le trastuzumab, plus connu sous son nom commercial, Herceptin®, qui bloque l'action de cette protéine.

Lorsque PACS 04 a été lancé, d'autres essais avaient montré que cette thérapie ciblée avait un effet bénéfique chez les patientes ayant un cancer du sein à un stade avancé. L'objectif dans PACS 04 était de voir si un traitement par trastuzumab à un stade plus précoce de la maladie était également bénéfique pour contrôler la maladie chez les patientes dont la tumeur du sein surexprime cette protéine HER2.

Les résultats aujourd'hui disponibles portent sur cette seconde question.

Ceux concernant la première question ne seront obtenus qu'après un suivi de cinq ans.

### *Quelles sont les patientes concernées ?*

Les femmes participant à PACS 04 avaient toutes, au moment de leur entrée dans l'essai, une maladie similaire : un cancer touchant un seul sein, avec des cellules cancéreuses retrouvées dans un ou plusieurs des ganglions environnants, mais sans localisation(s) secondaire(s)\*, et une tumeur pouvant être totalement retirée au cours d'une intervention chirurgicale. Ces femmes devaient être âgées de 18 à 65 ans.

Pour participer à la seconde partie de l'étude, les participantes devaient avoir une tumeur surexprimant la protéine HER2, c'est-à-dire avoir un « statut HER2

positif ». La détermination de ce statut est effectuée à partir d'un prélèvement de la tumeur. Les femmes avec un statut HER2 négatif ne pouvaient prendre part à cette seconde phase de l'essai car, dans leur cas, la thérapie ciblée n'a pas d'effet.

### Qui sont les participantes ?

Au total, 3 010 patientes ont été incluses dans PACS 04 entre février 2001 et août 2004. Elles sont suivies dans 82 centres de prise en charge répartis en France et en Belgique.

Parmi elles, 528 étaient HER2 positives et ont donc participé à la seconde partie de l'essai. Les résultats aujourd'hui disponibles portent sur la surveillance de ces 528 patientes. Il s'agit de femmes âgées en moyenne de 49 ans.

### Quels traitements les participantes ont reçu ?

Toutes les patientes ont bénéficié de l'ablation totale de leur tumeur (voir figure 1). Ensuite, elles ont été réparties par tirage au sort, ce que l'on appelle une randomisation\*, entre deux groupes de traitement :

- Le **groupe A** a reçu la chimiothérapie FEC 100, c'est-à-dire le traitement standard, pendant une durée prévue de six cycles ;
- Le **groupe B** a reçu la chimiothérapie épirubicine + docétaxel (ED), soit le nouveau traitement évalué, pendant une durée prévue de six cycles.

Une fois, la chimiothérapie terminée, les participantes qui en avaient

besoin ont reçu une radiothérapie pendant cinq semaines, puis, si leur maladie était hormonosensible, une hormonothérapie.

Les patientes avec un statut HER2 positif ont fait l'objet d'une seconde randomisation, à nouveau entre deux groupes :

- Le **groupe 1** a reçu la thérapie ciblée par trastuzumab pendant une durée maximale d'un an ;
- Le **groupe 2** n'a pas reçu la thérapie ciblée et a fait l'objet de la surveillance habituelle proposée aux femmes atteintes d'un cancer du sein.

Au départ de l'essai, on ne savait pas si le traitement par la thérapie ciblée apportait ou pas un bénéfice. Le fait de proposer un suivi sans traitement ne constituait donc pas une « perte de chance » pour les participantes du groupe 2, sachant que ce suivi est celui qui était proposé en pratique courante, hors du cadre des essais cliniques.

### Quels ont été les résultats observés en terme d'efficacité ?

Les résultats disponibles portent sur la question : le traitement par la thérapie ciblée permet-il de mieux éviter une réapparition de la maladie ? A cette question, la réponse apportée par l'essai PACS 04 est de prime abord négative.

Ainsi, après quatre ans de suivi :

- Le nombre de récurrences n'est pas statistiquement différent entre le groupe 1 et le groupe 2. Une récurrence

## [ \* LEXIQUE ]

- **Cycles** : administration à un rythme régulier du ou des médicaments d'un traitement sur un ou plusieurs jours, suivie d'une période de récupération.
- **Effet indésirable** : réaction nocive et non désirée liée à un médicament.
- **Localisation secondaire** : situation où des cellules cancéreuses provenant d'une tumeur se sont disséminées vers un autre organe et s'y sont développées. On parle également de métastase.
- **Randomisation** : répartition par tirage au sort des participants à un essai dans les différents groupes de traitement. Ce principe méthodologique permet de constituer des groupes comparables et ainsi de s'assurer que la comparaison entre les traitements d'un essai est scientifiquement valide.
- **Récidive** : réapparition d'une localisation cancéreuse après une période de rémission. On parle aussi de rechute.
- **Rémission** : disparition des signes et des symptômes d'une maladie. Dans le cas d'un cancer, on parle de rémission lorsque toute trace de la maladie a disparu.
- **Taxanes** : famille de médicaments de chimiothérapie dérivés d'une substance extraite des aiguilles d'un arbre, l'if.
- **Tolérance** : capacité de l'organisme à supporter les effets indésirables d'un traitement.
- **Tumeur** : masse formée par des cellules cancéreuses.

Figure 1 : schéma de l'essai

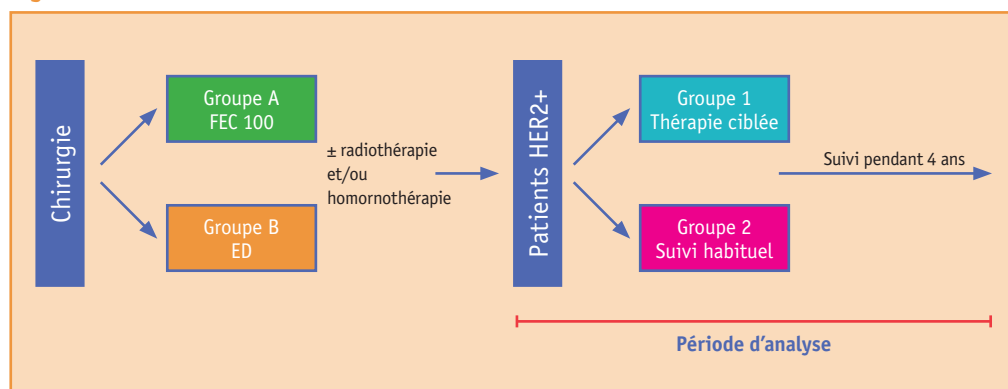

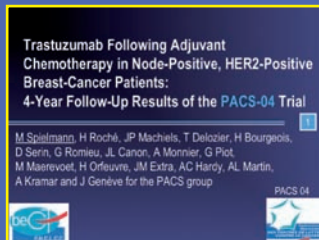

**Les résultats de l'essai PACS 04 sur la thérapie ciblée ont été présentés lors du 30<sup>e</sup> symposium sur le cancer du sein de San Antonio aux Etats-Unis qui s'est tenu du 13 au 17 décembre 2007.**

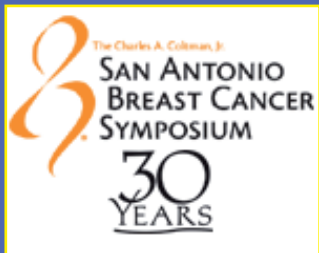

## Adresses utiles

Ligue Nationale Contre le Cancer  
14 rue Corvisart  
75014 Paris

Fédération Nationale des Centres de Lutte Contre le Cancer  
101 avenue de Tolbiac  
75013 Paris

de la maladie a été observée chez 23 % des patientes ayant reçu la thérapie ciblée et chez 26 % de celles ne l'ayant pas reçue.

- Le nombre de patientes décédées, quelle que soit la cause (y compris lorsque celle-ci n'avait pas de rapport avec le cancer), est similaire dans les deux groupes de patientes : 8,5 % parmi celles ayant reçu la thérapie ciblée et 7 % chez celles ayant été uniquement suivies (cette petite différence n'est pas statistiquement significative).

En d'autres termes, les résultats indiquent que la thérapie ciblée n'apporte pas de bénéfice supplémentaire par rapport à la chimiothérapie dans le contrôle de la maladie.

Il convient toutefois de souligner que cette absence de bénéfice s'observe au bout de quatre ans de suivi. Si l'on compare l'évolution des patientes des deux groupes plus tôt dans le suivi, on constate un moindre nombre de récurrences parmi les patientes sous thérapie ciblée pendant les dix-huit premiers mois. Au-delà, le bénéfice s'estompe.

### Quels ont été les résultats concernant la tolérance\* ?

Il n'a pas été observé d'effets indésirables\* inhabituels chez les patientes ayant reçu la thérapie ciblée. Globalement, le traitement a été bien toléré.

### Que faut-il penser de ces résultats ?

Ces résultats sont surprenants car ils ne concordent pas avec ceux d'autres études réalisées en Europe et aux Etats-Unis à peu près à la même période. Cependant, plusieurs explications peuvent être apportées :

Tout d'abord, les résultats d'autres essais, communiqués alors que PACS 04 était en cours, tendent à indiquer que les meilleurs résultats de la thérapie ciblée sont obtenus lorsque cette

dernière est administrée de façon précoce, c'est-à-dire en même temps que la chimiothérapie. Les essais comme PACS 04, où la thérapie ciblée a été administrée après la chimiothérapie, semblent montrer une moins bonne efficacité de celle-ci.

Par ailleurs, le bénéfice de la thérapie ciblée observée dans PACS 04 pendant les dix-huit premiers mois de suivi peut indiquer que ce traitement est efficace sur la prévention de la récurrence de la maladie tant qu'il est poursuivi, mais que son effet protecteur disparaît après son arrêt. Dans PACS 04, la durée de traitement par trastuzumab était d'un an, et c'est six mois plus tard que la différence entre les deux groupes sur le nombre de récurrences s'est estompée.

### Quels vont être les suites de l'essai ?

L'essai se poursuit pour l'ensemble des participantes. Toutes ont terminé le traitement prévu dans le cadre de l'essai et sont actuellement dans la phase de suivi. Il est en effet prévu que chaque patiente soit, depuis son inclusion, suivie pendant cinq ans. La dernière participante étant entrée dans l'essai en août 2004, l'essai devrait théoriquement prendre fin à la mi-août 2009. C'est dans les mois qui suivront que seront connus les résultats portant sur la première question de PACS 04 (laquelle des deux chimiothérapies adjuvantes est la plus efficace ?).

### En conclusion

PACS 04 ne confirme pas les résultats observés dans d'autres essais sur le bénéfice de la thérapie ciblée dans le traitement adjuvant du cancer du sein sans localisation secondaire. Ce résultat discordant s'explique vraisemblablement par les modalités d'administration de la thérapie ciblée (après la chimiothérapie et non en même temps que celle-ci), ce qui est un élément important. Dans tous les cas, cette observation ne remet pas en cause l'intérêt et la poursuite de PACS 04 concernant la comparaison entre les deux chimiothérapies évaluées.

---

**Les responsables de l'essai tiennent à remercier chacune des patientes pour sa participation.**

---
